# Supplementary material for: Three-dimensional porous NiCoP foam enabled high-performance overall seawater splitting at high current density
Source: Royal Society of Chemistry journal article supplement (doi:10.1039/d3ta07898a), 2024-01-01
Supplement: d3ta07898a1.pdf [file d3ta07898a1.pdf]

## Electronic Supplementary Information

### Experimental Section

**Materials:** Hydrochloric acid (HCl), sulfuric acid (H<sub>2</sub>SO<sub>4</sub>), potassium permanganate (KMnO<sub>4</sub>), ethyl alcohol (C<sub>2</sub>H<sub>5</sub>OH), sodium carbonate (Na<sub>2</sub>CO<sub>3</sub>), and potassium hydroxide (KOH) were purchased from Chengdu Kelong Chemical Reagent Factory. Nickel chloride hexahydrate (NiCl<sub>2</sub>·6H<sub>2</sub>O), cobalt chloride hexahydrate (CoCl<sub>2</sub>·6H<sub>2</sub>O), ruthenium oxide (RuO<sub>2</sub>), Pt/C (20% wt% Pt on Vulcan XC-72R), Nafion (5 wt%), ammonium chloride (NH<sub>4</sub>Cl), and sodium hypophosphite (NaH<sub>2</sub>PO<sub>2</sub>) were provided by Aladdin Industrial Co. Ltd. N, N-diethyl-p-phenylenediamine (DPD) was achieved from Shanghai Maclin Biochemical Technology Co., Ltd. All the reagents and chemicals were used as received without further purification. The deionized water (resistivity: 18.3 MΩ·cm) used for all experiments was purified through a Millipore system. Natural seawater was obtained from Weihai, Shandong, China, and most of the magnesium and calcium salts were eliminated by adding 6.8 g Na<sub>2</sub>CO<sub>3</sub> to 1 L of natural seawater before use. Ni foam (NF, thickness: 1.5 mm, porosity: ≥ 95%) was bought from Shenzhen Green and Creative Environmental Science and Technology Co. Ltd.

**Preparation of Ni-Co alloy foam/NF:** Ni-Co alloy on NF was prepared by a one-step dynamic hydrogen bubble template method. Initially, a piece of NF (2 × 3 cm<sup>2</sup>) was immersed into a 2 M HCl solution for 10 minutes to remove any potential surface oxide layer. Subsequently, the NF was alternately washed in ethanol and deionized water for 5 minutes each, using sonication to eliminate any residual chemical traces. The electrodynamic deposition was performed at room temperature using a three-electrode cell set-up. The working electrode with NF, the reference electrode (Ag/AgCl, saturated KCl),

and the counter electrode (graphite) were immersed in an electrolyte solution composed of 0.2 M  $\text{CoCl}_2$ , 0.05 M  $\text{NiCl}_2 \cdot 6\text{H}_2\text{O}$ , and 2.0 M  $\text{NH}_4\text{Cl}$ . The deposition process was carried out at a constant current of  $-2 \text{ A/cm}^2$  for 120 seconds at room temperature. After deposition, the prepared Ni-Co alloy foam/NF was thoroughly rinsed with deionized water and air-dried overnight.

**Preparation of NiCoP foam/NF:** A porcelain boat containing approximately 0.5 g of  $\text{NaH}_2\text{PO}_2$ , along with another porcelain boat holding a piece of the as-prepared Ni-Co alloy foam/NF, was positioned in the center of a tube furnace. It is important to place the  $\text{NaH}_2\text{PO}_2$  on the upstream side of the furnace. Before initiating the heating process, argon gas flowed through the tube. The furnace temperature was then gradually increased to 300 °C at a rate of 2 °C/min and maintained at this temperature for 2 hours under an argon atmosphere. Following this, the system was allowed to cool down to room temperature, resulting in the formation of the NiCoP foam/NF.

**Synthesis of  $\text{Ni}_2\text{P}$  and  $\text{Co}_2\text{P}$  foam/NF:** The procedures for synthesizing  $\text{Ni}_2\text{P}$  and  $\text{Co}_2\text{P}$  foam/NF are similar to those used for NiCoP foam/NF, with a few key differences. Specifically, for  $\text{Ni}_2\text{P}$  foam /NF, the material is immersed in an electrolyte solution consisting of 0.05 M  $\text{NiCl}_2 \cdot 6\text{H}_2\text{O}$ , and 2.0 M  $\text{NH}_4\text{Cl}$ . In contrast, for  $\text{Co}_2\text{P}$  foam/NF, the immersion is in a solution of 0.2 M  $\text{CoCl}_2$  and 2.0 M  $\text{NH}_4\text{Cl}$ . Following these immersion steps, both alloy foams undergo phosphidation under the same conditions as used for the NiCoP foam/NF.

**Synthesis of  $\text{RuO}_2$  or Pt/C on NF:** 5 mg  $\text{RuO}_2$  (or 20% Pt/C) was added to a mixture containing 30  $\mu\text{L}$  of Nafion, 485  $\mu\text{L}$  of ethanol, and 485  $\mu\text{L}$  of deionized water. To ensure a homogenous dispersion, the solution was subjected to ultrasonication for 30 minutes,

resulting in a concentration of 5 mg/mL. Subsequently, 150  $\mu$ L of this catalyst ink was carefully dropped onto a piece of cleaned NF (0.5 cm  $\times$  0.5 cm) with a loading mass of 0.75 mg.

**Characterization:** Scanning electron microscopy (SEM) images and energy-dispersive X-ray spectroscopic (EDX) analyses were performed on Zeiss Gemini SEM 300 at an accelerating voltage of 5 kV and Transmission electron microscopy (TEM) was carried out with a HITACHI H-8100 electron microscope (Hitachi, Tokyo, Japan) operated at 200 kV. The X-ray diffraction (XRD) patterns were conducted with a Rigaku Smartlab9KW diffraction system with a Cu  $K\alpha$  source ( $\lambda = 1.54056 \text{ \AA}$ ). XPS measurements were performed on Thermo ESCALAB 250XI, adopting Mg as the excitation source.

**Electrocatalytic measurements:** All electrochemical experiments were conducted using a CHI 660E electrochemical analyzer (CH Instruments, Inc., Shanghai). The electrochemical activity of the NiCoP foam/NF for HER and OER was performed with a three-electrode system. In this setup, the as-prepared NiCoP foam/NF served as the working electrode, a Hg/HgO electrode was employed as the reference electrode, and a graphite rod was utilized as the counter electrode. The overall water-splitting performance of the electrolyzers was tested in a two-electrode system, designating the OER electrode as the anode and the HER electrode as the cathode. The experiments were conducted in a strong alkaline seawater electrolyte, with a pH of approximately 14. To mitigate the influence of the Ni<sup>2+</sup> to Ni<sup>3+</sup> oxidation peak on the catalytic current density and ensure accurate overpotential calculations, linear sweep voltammetry (LSV) was performed using backward scans (from positive to negative direction) for the polarization curves. In this

study, the changing potentials were reported relative to the reversible hydrogen electrode (RHE), based on the following equation:

$$E(vs.RHE) = E(vs.Hg/HgO) + 0.059pH + 0.098V$$

Cyclic voltammetry (CV) curves for the OER were obtained within a potential range of 0 V to 1.5 V versus Hg/HgO, at a scan rate of 50 mV/s over 50 cycles to activate the electrodes. Similarly, CV curves for the HER were recorded from -2 V to 0 V versus Hg/HgO, also at a scan rate of 50 mV/s for 50 cycles. The LSV parameters for OER and HER were set with a scanning range of 1.5 V to 0 V, and -2 V to 0 V, respectively, both at a scan rate of 10 mV/s. The potential range of CV curves for overall water-splitting is from 3.2 V to 1.0 V, and the scan rate is 10 mV/s for 50 cycles. All tests were conducted at a controlled temperature of  $25 \pm 1$  °C. The electrochemical impedance spectroscopy (EIS) measurements spanned a frequency range of 0.01 Hz to 100 kHz. To determine the double-layer capacitance ( $C_{dl}$ ) values, CV curves were generated at varying scan rates from 30 ~ 90 mV/s. The chronopotentiometry stability test was carried out to assess the stability and durability of the catalysts under a constant high current density of 1000 mA/cm<sup>2</sup> for OER, HER, and overall water-splitting. All data have been adjusted for iR compensation. The iR-compensated potential was calculated based on the following equation:

$$E_{corr} = E - iR$$

where  $E$  is the original potential,  $R$  is the solution resistance,  $i$  is the corresponding current, and  $E_{corr}$  is the iR-compensated potential.

**Gas Chromatography Test:** Seawater oxidation for gas chromatography (Shimadzu GC-2014C TCD) tests were conducted in a sealed custom-built three-electrode cell containing

a 1 M KOH + seawater electrolyte. To sustain oxygen production, chronopotentiometry was employed, maintaining a steady current of 500 mA/cm<sup>2</sup>.

**Phosphate buffer solution (PBS, pH 6.5):** Initially, 12 g of Na<sub>2</sub>HPO<sub>4</sub> and 23 g of KH<sub>2</sub>PO<sub>4</sub> were mixed into 100 mL of deionized water until fully dissolved. Following this, 100 mL of an EDTA-2Na aqueous solution (4 mg/mL) was incorporated into the mixture. This combined solution was then poured into a 500 mL volumetric flask and topped up with deionized water to the marked scale line.

**DPD chromogenic agent:** Firstly, 0.5 g of DPD was dissolved in 100 mL of deionized water containing 2 mL of concentrated H<sub>2</sub>SO<sub>4</sub> and 0.1 g of EDTA-2Na. The mixture was then diluted to a total volume of 500 mL and transferred to a brown bottle, which should be stored away from light to maintain its stability.

**Active chlorine standard curve:** Since directly obtaining a standard solution of active chlorine is challenging, a widely used method involves employing KMnO<sub>4</sub> as an oxidizing agent to convert its oxidation capacity into an equivalent active chlorine content, thereby establishing the standard curve. Through practical calibration with a sodium hypochlorite solution, observing changes in oxidation states during the reaction, and measuring the absorbance of the reactants, it has been established that a solution of 891 mg/L KMnO<sub>4</sub> is equivalent to a 1000 mL/g chlorine-containing standard solution. This conversion forms the basis for establishing a standard curve for active chlorine using the masses of the mentioned substances.

**Determination of active chlorine:** The active chlorine concentration in the electrolyte was measured with the DPD method and a UV-vis spectrophotometer. (*J. Electroanal. Chem.*,

2018, **819**,260; *Inorg. Chem. Front.*, 2023, **10**, 2100) Initially, 100  $\mu\text{L}$  of the electrolyte was sequentially combined with 50  $\mu\text{L}$  of  $\text{H}_2\text{SO}_4$  (1.0 M), 50  $\mu\text{L}$  of NaOH (2.0 M), and 4.8 mL of deionized water. Subsequently, 250  $\mu\text{L}$  of DPD reagent and 250  $\mu\text{L}$  of PBS (pH = 6.5) were added to the mixture. After following the solution to stand for two minutes, it turned a transparent pink color. The absorbance at 550 nm was then recorded using UV-visible absorption spectroscopy to analyze the concentrations of various active chlorine species.

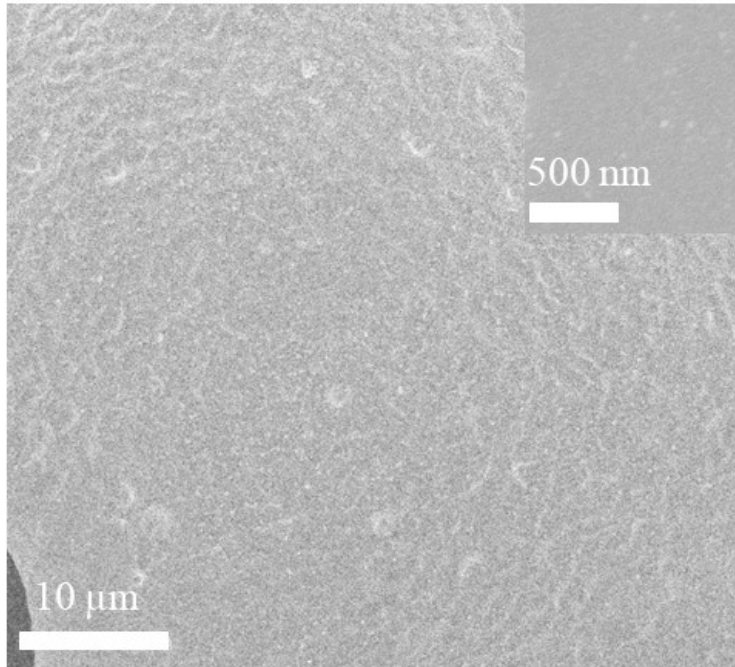

**Fig. S1.** SEM images of bare NF.

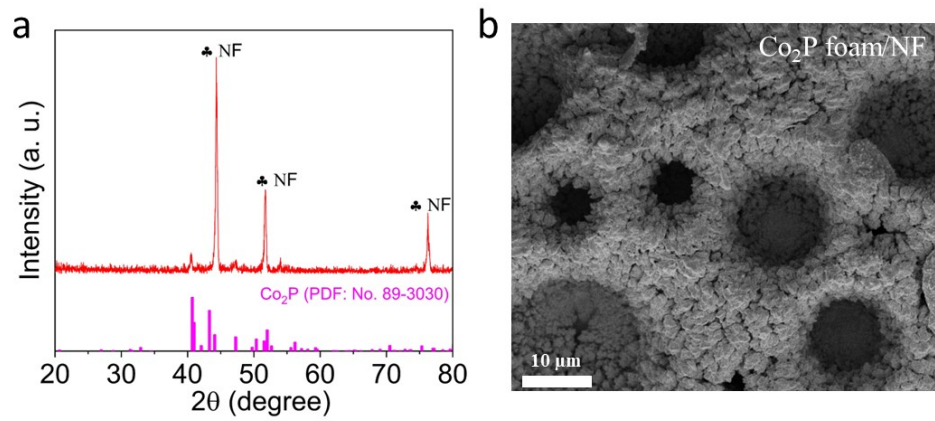

**Fig. S2.** (a) XRD pattern and (b) SEM image of  $\text{Co}_2\text{P}$  foam/NF.



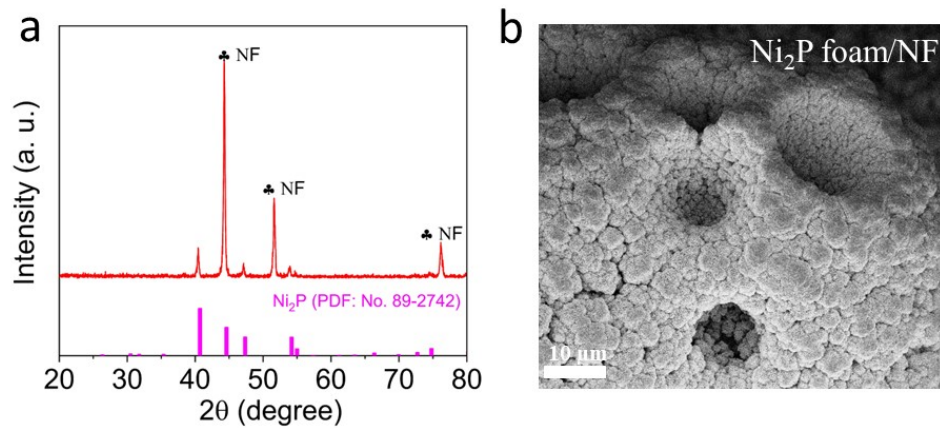

**Fig. S3.** (a) XRD pattern and (b) SEM image of  $\text{Ni}_2\text{P}$  foam/NF.

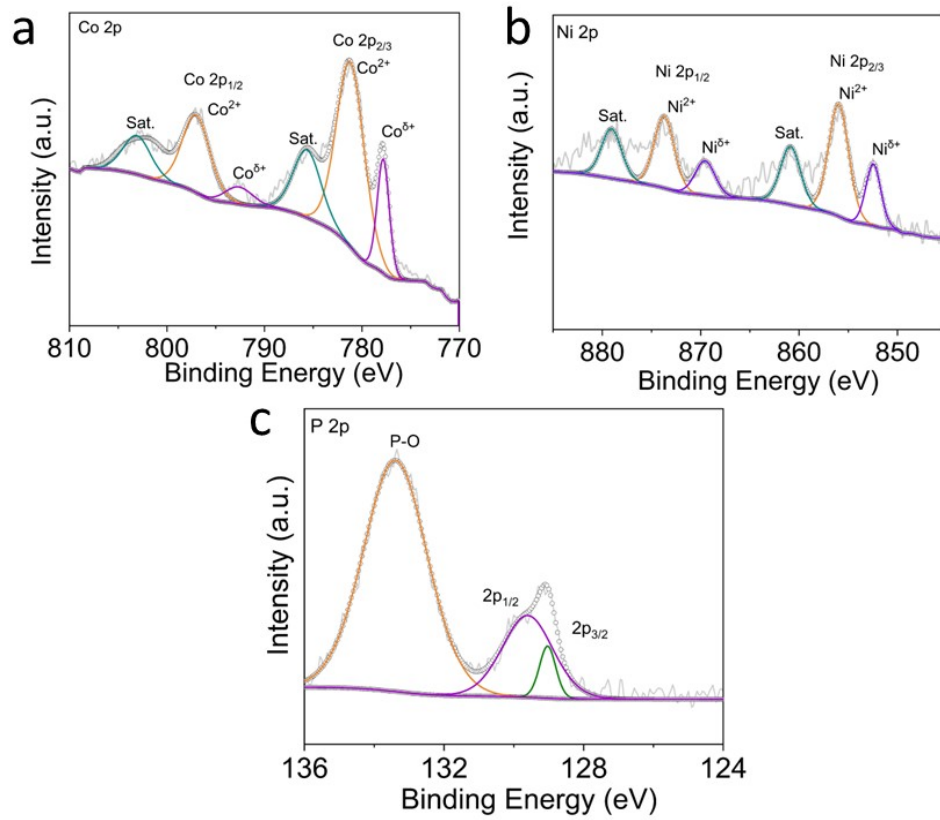

**Fig. S4.** High-resolution XPS spectra for NiCoP in the (a) Co 2p, (b) Ni 2p, and (c) P 2p regions.

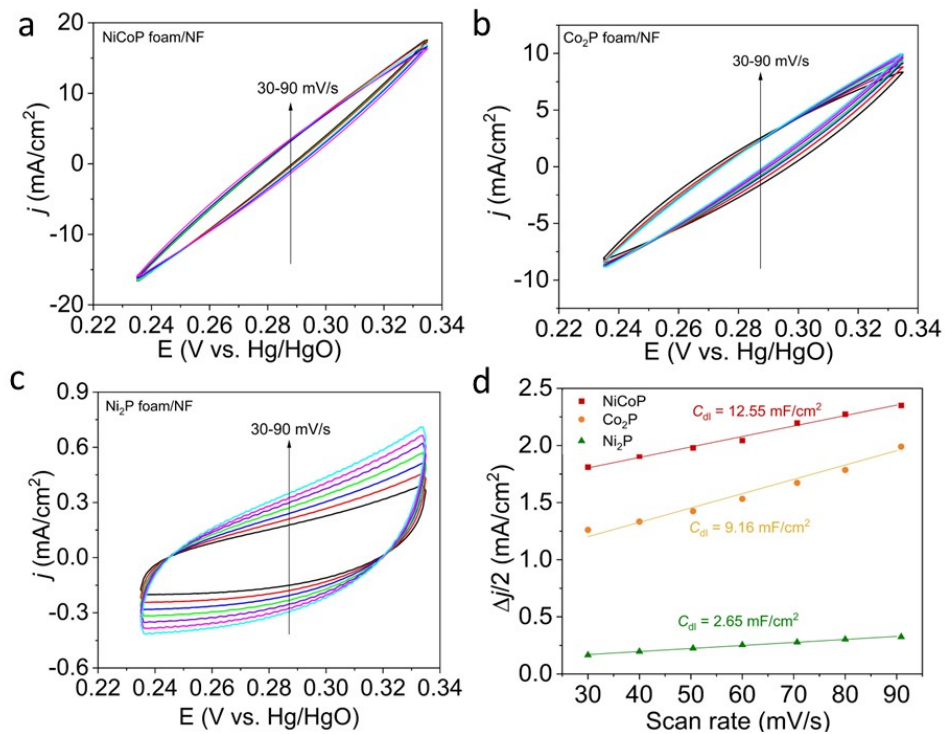

**Fig. S5.** Cyclic voltammetry curves for (a) NiCoP foam/NF, (b) Co<sub>2</sub>P foam/NF, and (c) Ni<sub>2</sub>P foam/NF in the double layer region at different scan rates of 30 ~ 90 mV/s. (d) Capacitive current densities of NiCoP foam/NF, Co<sub>2</sub>P foam/NF, and Ni<sub>2</sub>P foam/NF at 0.285 V vs. Hg/HgO as a function of the scan rate.

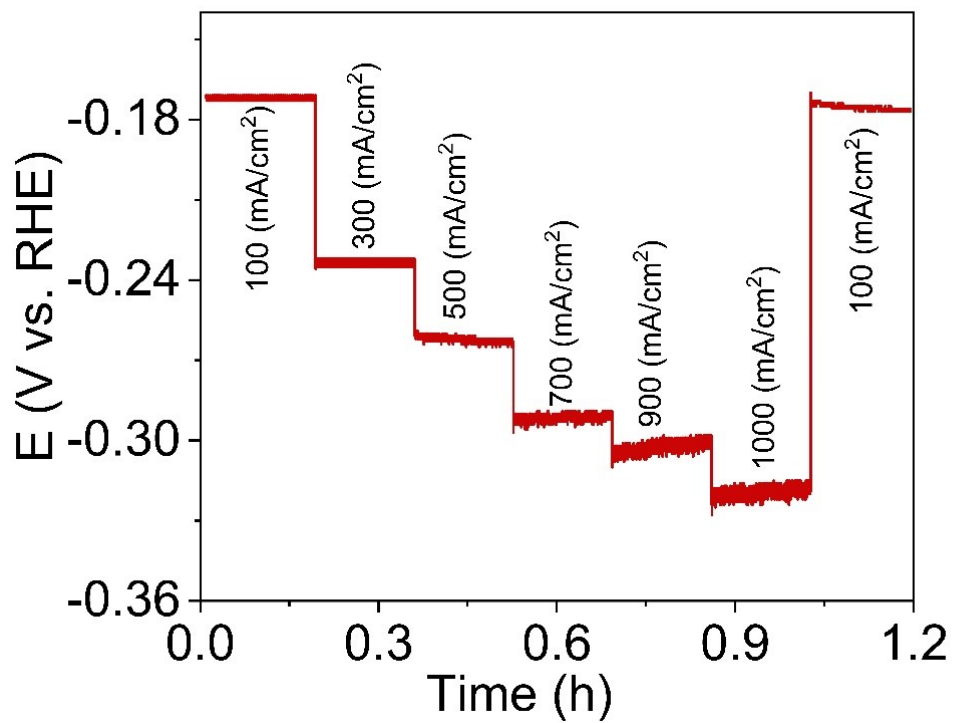

**Fig. S6.** Multi-current process of NiCoP foam/NF for HER. The current density started at 100 mA/cm<sup>2</sup> and ended at 100 mA/cm<sup>2</sup>.

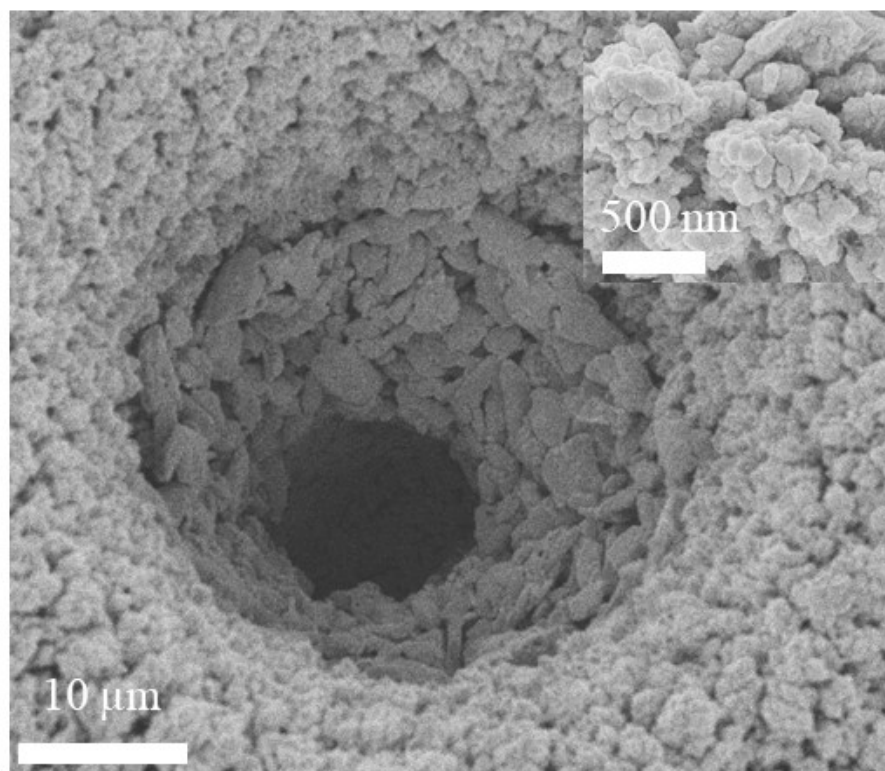

**Fig. S7.** SEM images of NiCoP foam/NF after durability test of HER in 1 M KOH + seawater solution.

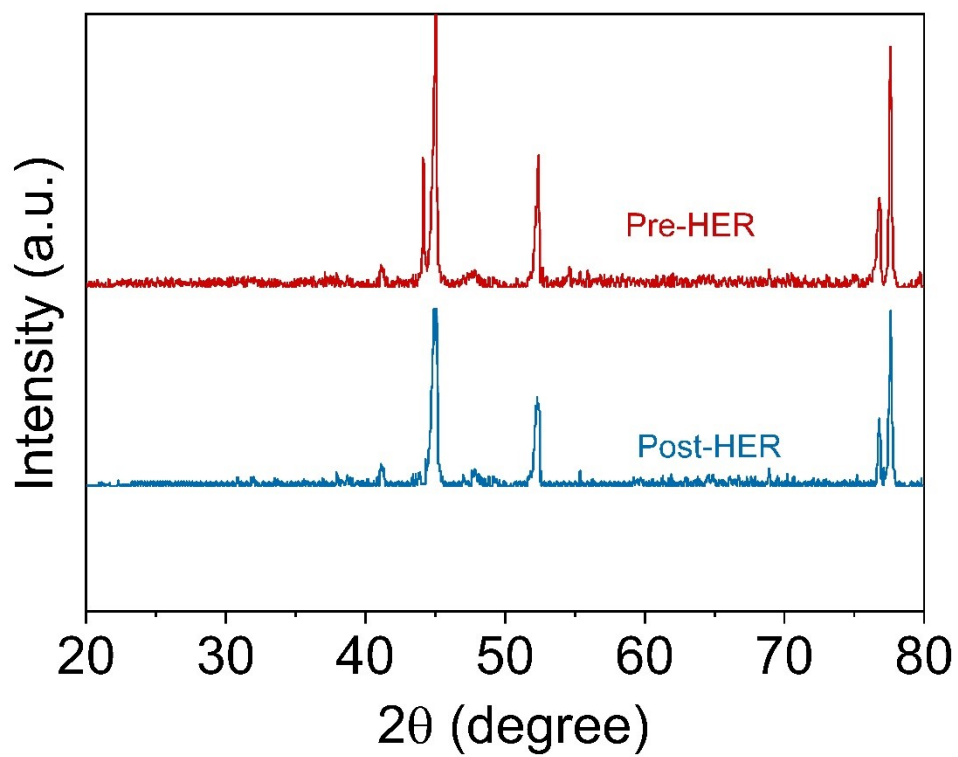

**Fig. S8.** XRD patterns for pre- and post-HER NiCoP foam/NF tested in 1 M KOH + seawater solution.

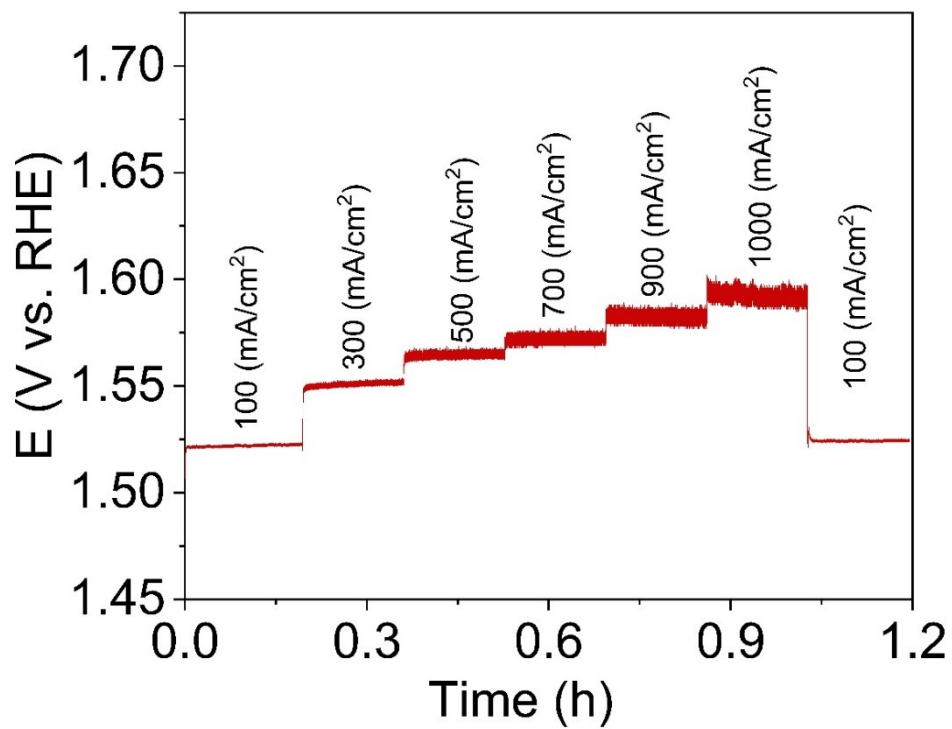

**Fig. S9.** Multi-current process of NiCoP foam/NF for OER. The current density started at 100 mA/cm<sup>2</sup> and ended at 100 mA/cm<sup>2</sup>.

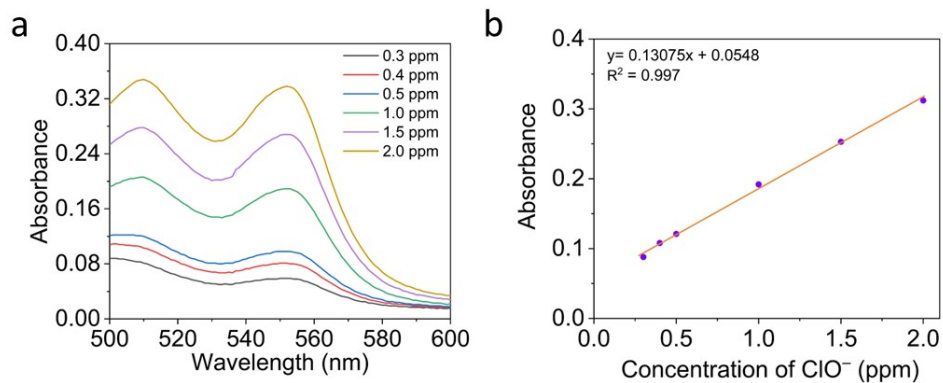

**Fig. S10.** (a) UV-vis absorption spectra of ClO<sup>-</sup> with different concentrations. (b) Calibration curve used for calculating ClO<sup>-</sup> concentrations of the electrolyte.



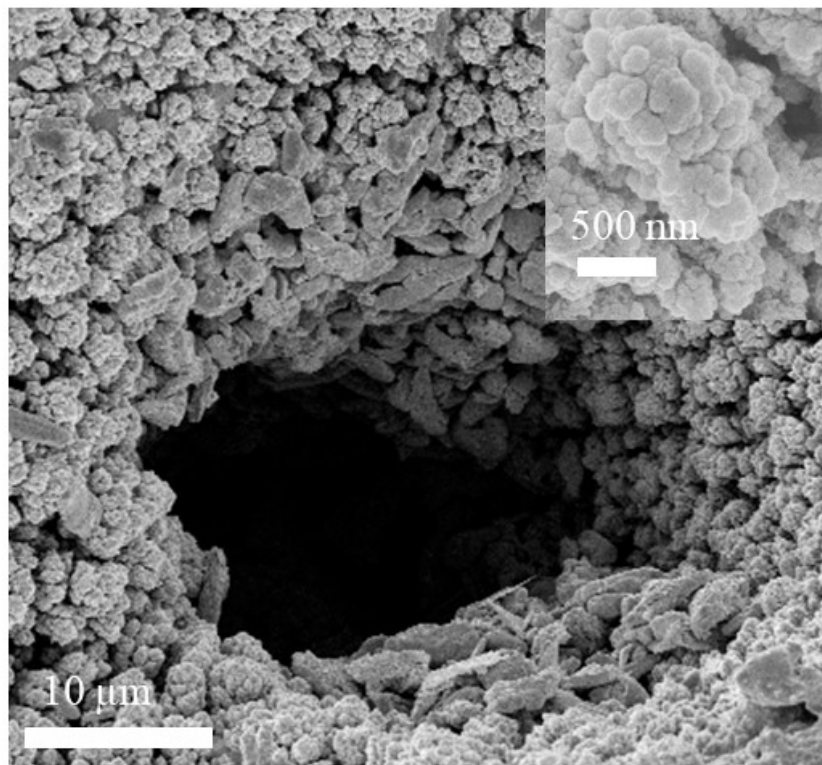

**Fig. S11.** SEM images of NiCoP foam/NF after durability test of OER in 1 M KOH + seawater solution.

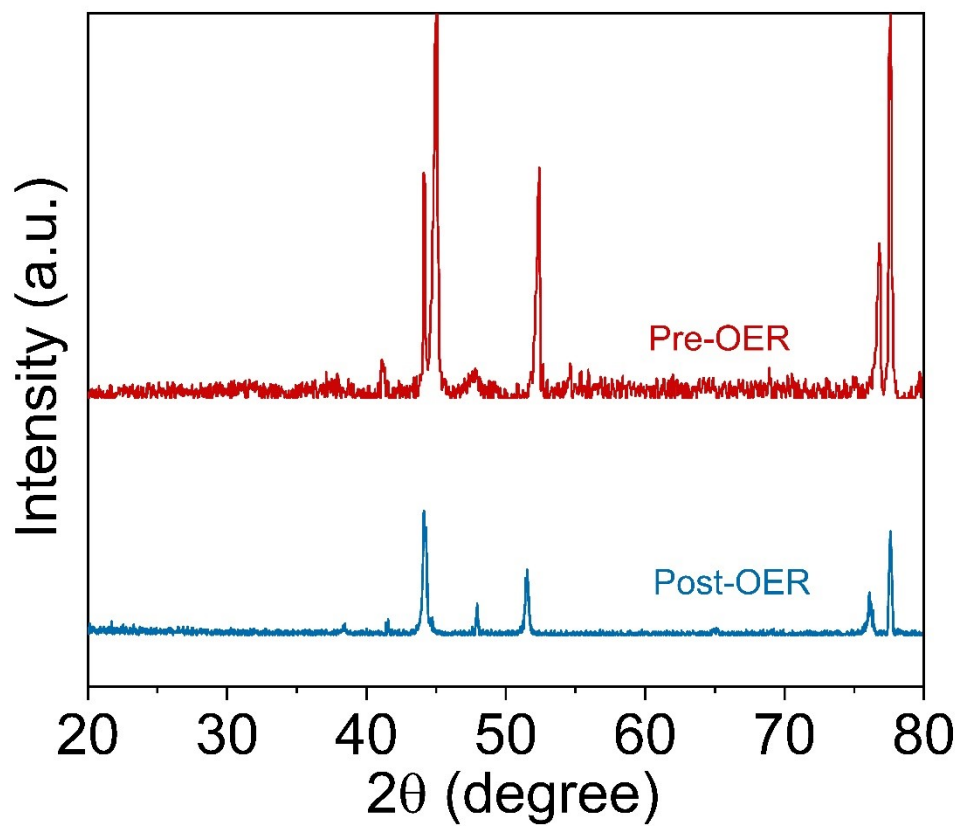

**Fig. S12.** XRD patterns for pre- and post-OER NiCoP foam/NF tested in 1 M KOH + seawater solution.

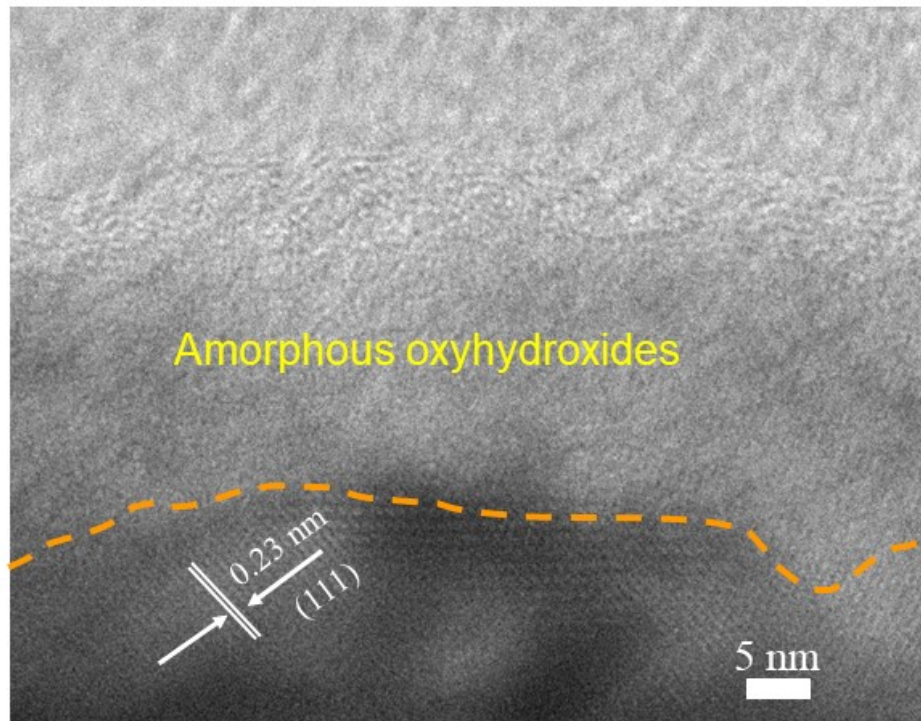

**Fig. S13.** HRTEM image of NiCoP after durability test of OER in 1 M KOH + seawater solution.

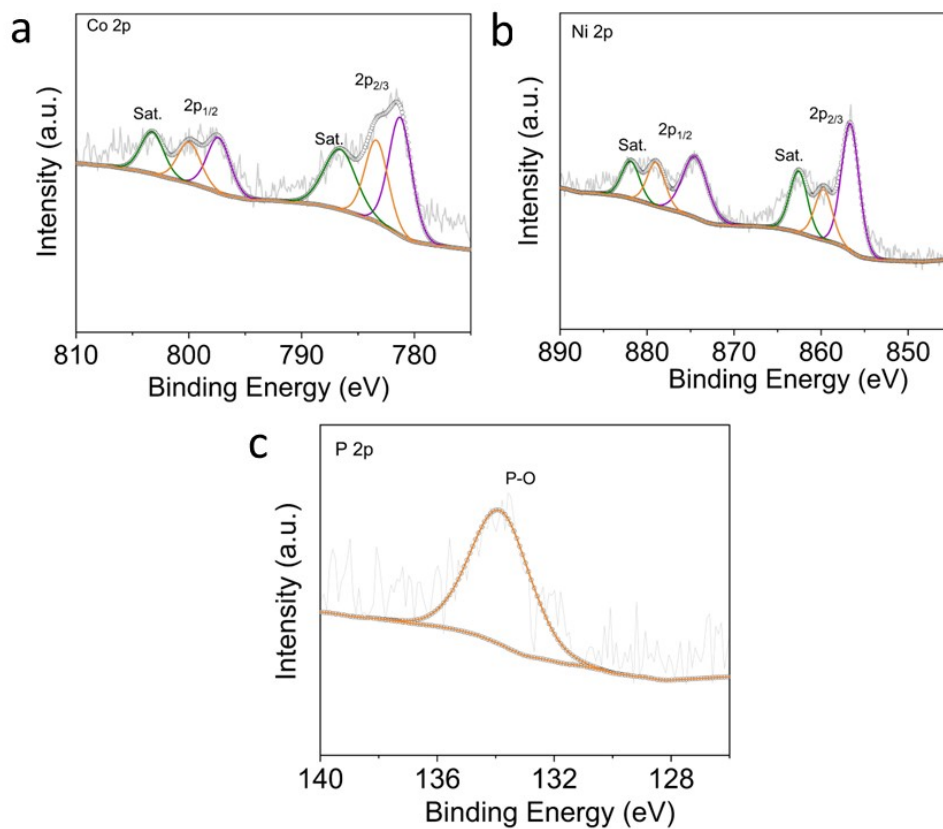

**Fig. S14.** High-resolution XPS spectra for NiCoP in the (a) Co 2p, (b) Ni 2p, and (c) P 2p regions after durability test of OER in 1 M KOH + seawater solution.

**Table S1.** Comparison of HER performances for NiCoP foam/NF with recently reported electrocatalysts in alkaline seawater.

| Electrocatalyst                              | Electrolyte        | $\eta_{100}$<br>(mV) | $\eta_{1000}$<br>(mV) | Testing time                   | Ref.                                                           |
|----------------------------------------------|--------------------|----------------------|-----------------------|--------------------------------|----------------------------------------------------------------|
| NiCoP foam/NF                                | 1 M KOH + seawater | 171                  | 328                   | 300 h @1000 mA/cm <sup>2</sup> | This work                                                      |
| B-NiCoP                                      | 1 M KOH + seawater | 223                  | N/A                   | 85 h @100 mA/cm <sup>2</sup>   | <i>ACS Appl. Energy Mater.</i> , 2023, <b>6</b> , 10713–10722  |
| Fe <sub>2</sub> P/Ni <sub>2</sub> N          | 1 M KOH + seawater | 109                  | 208                   | 40 h @100 mA/cm <sup>2</sup>   | <i>Small</i> , 2023, <b>19</b> , 2207082                       |
| Ru-CoO <sub>x</sub> /NF                      | 1 M KOH + seawater | 120                  | 252                   | 100 h @70 mA/cm <sup>2</sup>   | <i>Small</i> , 2021, <b>17</b> , 2102777                       |
| Co <sub>x</sub> P <sub>v</sub> @NF           | 1 M KOH + seawater | 189                  | 232                   | 100 h @800 mA/cm <sup>2</sup>  | <i>Nano Energy</i> , 2023, <b>109</b> , 108292                 |
| MnCo/NiSe/NF                                 | 1 M KOH + seawater | 202                  | 270                   | 200 h @500 mA/cm <sup>2</sup>  | <i>Appl. Catal. B</i> , 2023, <b>325</b> , 122355              |
| Ni <sub>2</sub> P-Fe <sub>2</sub> P/NF       | 1 M KOH + seawater | 232                  | 389                   | 40 h @500 mA/cm <sup>2</sup>   | <i>Adv. Funct. Mater.</i> , 2021, <b>31</b> , 2006484          |
| Co-P@NN                                      | 1 M KOH + seawater | 245                  | 365                   | N/A                            | <i>J. Colloid Interface. Sci.</i> , 2023, <b>645</b> , 227–240 |
| Ru-Ni(Fe)P <sub>2</sub> /NF                  | 1 M KOH + seawater | 280                  | 361                   | N/A                            | <i>Small</i> , 2023, <b>19</b> , 2300030                       |
| Mn-doped Ni <sub>2</sub> P/Fe <sub>2</sub> P | 1 M KOH + seawater | 300                  | 470                   | 100 h @500 mA/cm <sup>2</sup>  | <i>Chem. Eng. J.</i> , 2023, <b>454</b> , 140061               |
| RuNi-Fe <sub>2</sub> O <sub>3</sub> /IF      | 1 M KOH + seawater | 150                  | 350                   | 20 h @100 mA/cm <sup>2</sup>   | <i>Chinese J. Catal.</i> , 2022, <b>43</b> , 2202–2211         |

$\eta_{100}$  represents the overpotentials required to attain  $j$  of 100 mA/cm<sup>2</sup>.

$\eta_{1000}$  represents the overpotentials required to attain  $j$  of 1000 mA/cm<sup>2</sup>.

**Table S2.** Comparison of OER performances for NiCoP foam/NF with other reported electrocatalysts in alkaline seawater.

| Electrocatalyst                              | Electrolyte        | $\eta_{100}$ (mV) | $\eta_{1000}$ (mV) | Testing time                   | Ref.                                                           |
|----------------------------------------------|--------------------|-------------------|--------------------|--------------------------------|----------------------------------------------------------------|
| NiCoP foam/NF                                | 1 M KOH + seawater | 291               | 356                | 300 h @1000 mA/cm <sup>2</sup> | This work                                                      |
| Fe <sub>2</sub> P-NiCoP                      | 1 M KOH + seawater | 300               | N/A                | 30 h @20 mA/cm <sup>2</sup>    | <i>Mater. Today Physics</i> , 2022, <b>24</b> , 100684         |
| Fe <sub>2</sub> P/Ni <sub>2</sub> N          | 1 M KOH + seawater | 225               | 340                | 40 h @500 mA/cm <sup>2</sup>   | <i>Small</i> , 2023, <b>19</b> , 2207082                       |
| Co <sub>x</sub> P <sub>v</sub> @NF           | 1 M KOH + seawater | 287               | 356                | N/A                            | <i>Nano Energy</i> , 2023, <b>109</b> , 108292                 |
| Mn-doped Ni <sub>2</sub> P/Fe <sub>2</sub> P | 1 M KOH + seawater | 240               | 358                | 100 h @500 mA/cm <sup>2</sup>  | <i>Chem. Eng. J.</i> , 2023, <b>454</b> , 140061               |
| Ru-CoO <sub>x</sub> /NF                      | 1M KOH + seawater  | 220               | 390                | 100 h @70 mA/cm <sup>2</sup>   | <i>Small</i> , 2021, <b>17</b> , 2102777                       |
| Ni <sub>2</sub> P-Fe <sub>2</sub> P/NF       | 1 M KOH + seawater | 220               | 400                | 48 h @500 mA/cm <sup>2</sup>   | <i>Adv. Funct. Mater.</i> , 2021, <b>31</b> , 2006484          |
| Co-P@NN                                      | 1 M KOH + seawater | 389               | 435                | 24 h @10 mA/cm <sup>2</sup>    | <i>J. Colloid Interface. Sci.</i> , 2023, <b>645</b> , 227–240 |
| MnCo/NiSe/NF                                 | 1 M KOH + seawater | N/A               | 460                | 100 h @70 mA/cm <sup>2</sup>   | <i>Appl. Catal. B</i> , 2023, <b>325</b> , 122355              |
| Ru-Ni(Fe)P <sub>2</sub> /NF                  | 1 M KOH + seawater | 287               | 520                | N/A                            | <i>Small</i> , 2023, <b>19</b> , 2300030                       |
| RuNi-Fe <sub>2</sub> O <sub>3</sub> /IF      | 1 M KOH + seawater | 330               | 495                | 20 h @100 mA/cm <sup>2</sup>   | <i>Chinese J. Catal.</i> , 2022, <b>43</b> , 2202–2211         |

**Table S3.** Comparison of overall seawater splitting performance of NiCoP foam/NF || NiCoP foam/NF with recently reported electrocatalysts under alkaline conditions.

| Electrocatalyst                                                                    | Electrolyte        | $V_{100}$ (V) | $V_{1000}$ (V) | Testing time                   | Ref.                                                           |
|------------------------------------------------------------------------------------|--------------------|---------------|----------------|--------------------------------|----------------------------------------------------------------|
| NiCoP foam/NF    NiCoP foam/NF                                                     | 1 M KOH + seawater | 1.28          | 1.97           | 300 h @1000 mA/cm <sup>2</sup> | This work                                                      |
| Fe <sub>2</sub> P/Ni <sub>2</sub> N    Fe <sub>2</sub> P/Ni <sub>2</sub> N         | 1 M KOH + seawater | 1.65          | N/A            | 40 h @500 mA/cm <sup>2</sup>   | <i>Small</i> , 2023, <b>19</b> , 2207082                       |
| Co <sub>x</sub> P <sub>v</sub> @NF    Co <sub>x</sub> P <sub>v</sub> @NF           | 1M KOH + seawater  | 1.54          | 1.88           | N/A                            | <i>Nano Energy</i> , 2023, <b>109</b> , 108292                 |
| Mn-Ni <sub>2</sub> P/Fe <sub>2</sub> P    Mn-Ni <sub>2</sub> P/Fe <sub>2</sub> P   | 1 M KOH + seawater | 1.82          | N/A            | 120 h @500 mA/cm <sup>2</sup>  | <i>Chem. Eng. J.</i> , 2023, <b>454</b> , 140061               |
| Ru-CoO <sub>x</sub> /NF    Ru-CoO <sub>x</sub> /NF                                 | 1 M KOH + seawater | 1.55          | 2.62           | N/A                            | <i>Small</i> , 2021, <b>17</b> , 2102777                       |
| Ni <sub>2</sub> P-Fe <sub>2</sub> P/NF    Ni <sub>2</sub> P-Fe <sub>2</sub> P/NF   | 1 M KOH + seawater | 1.87          | 2.1            | N/A                            | <i>Adv. Funct. Mater.</i> , 2021, <b>31</b> , 2006484          |
| Co-P@NN    Co-P@NN                                                                 | 1 M KOH + seawater | 1.82          | 2.2            | N/A                            | <i>J. Colloid Interface. Sci.</i> , 2023, <b>645</b> , 227–240 |
| MnCo/NiSe/NF    MnCo/NiSe/NF                                                       | 1 M KOH + seawater | N/A           | 3.03           | 200 h @500 mA/cm <sup>2</sup>  | <i>Appl. Catal. B</i> , 2023, <b>325</b> , 122355              |
| Ru-Ni (Fe)P <sub>2</sub> /NF    Ru-Ni (Fe)P <sub>2</sub> /NF                       | 1 M KOH + seawater | N/A           | 2.59           | 50 h @600 mA/cm <sup>2</sup>   | <i>Small</i> , 2023, <b>19</b> , 2300030                       |
| RuNi-Fe <sub>2</sub> O <sub>3</sub> /IF    RuNi-Fe <sub>2</sub> O <sub>3</sub> /IF | 1 M KOH + seawater | 2.8           | 3.12           | 100 h @100 mA/cm <sup>2</sup>  | <i>Chinese J. Catal.</i> , 2022, <b>43</b> , 2202–2211         |
